# Supplementary material
Source: Springer Nature journal article supplement (https://www.springermedizin.de/resource/supplementary/12958_2005_294_MOESM5_ESM.pdf/9567560)

**(A)****immature GV oocytes**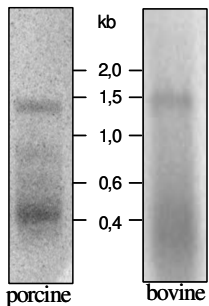**(B)**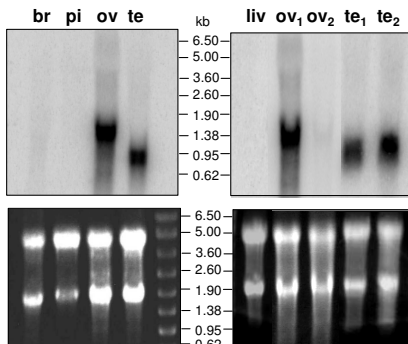**(C)****SsZAR1**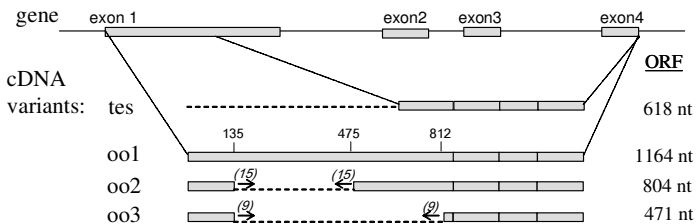

Supplement: MOESM5 [file 9567560]
